# Supplementary material for: Polymeric networks of copper(ii) using succinate and aromatic N–N donor ligands: synthesis, crystal structure, magnetic behaviour and the effect of weak interactions on their crystal packing
Source: Royal Society of Chemistry journal article supplement (doi:10.1039/b401738b), 2004-01-01
Supplement: b401738b.doc [file b401738b.doc]

**Supplementary Figures:**

**
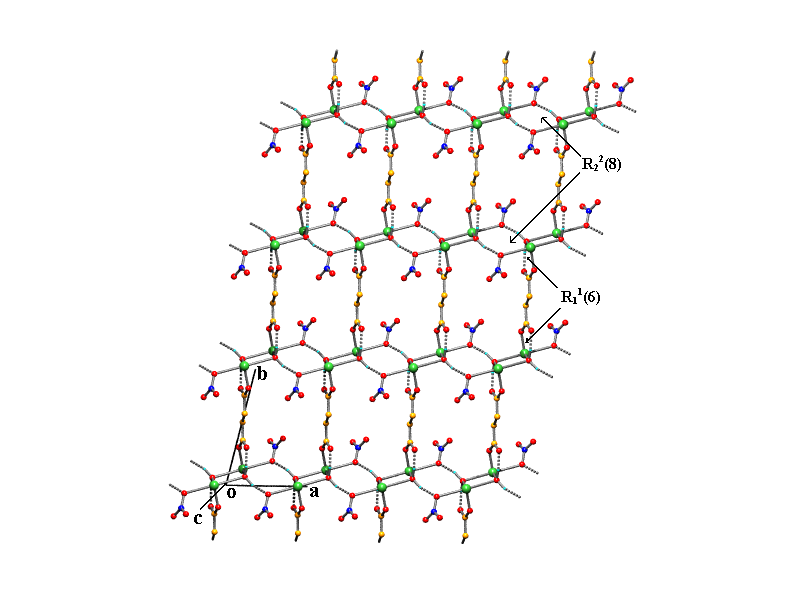
**

**Supplementary Figure 1.** A brick-wall sheet of **2** in *ac*-plane showing the recurrence of R22(8) and R11(6) synthon (H-bonds are shown as dotted lines; phen is omitted for clarity).


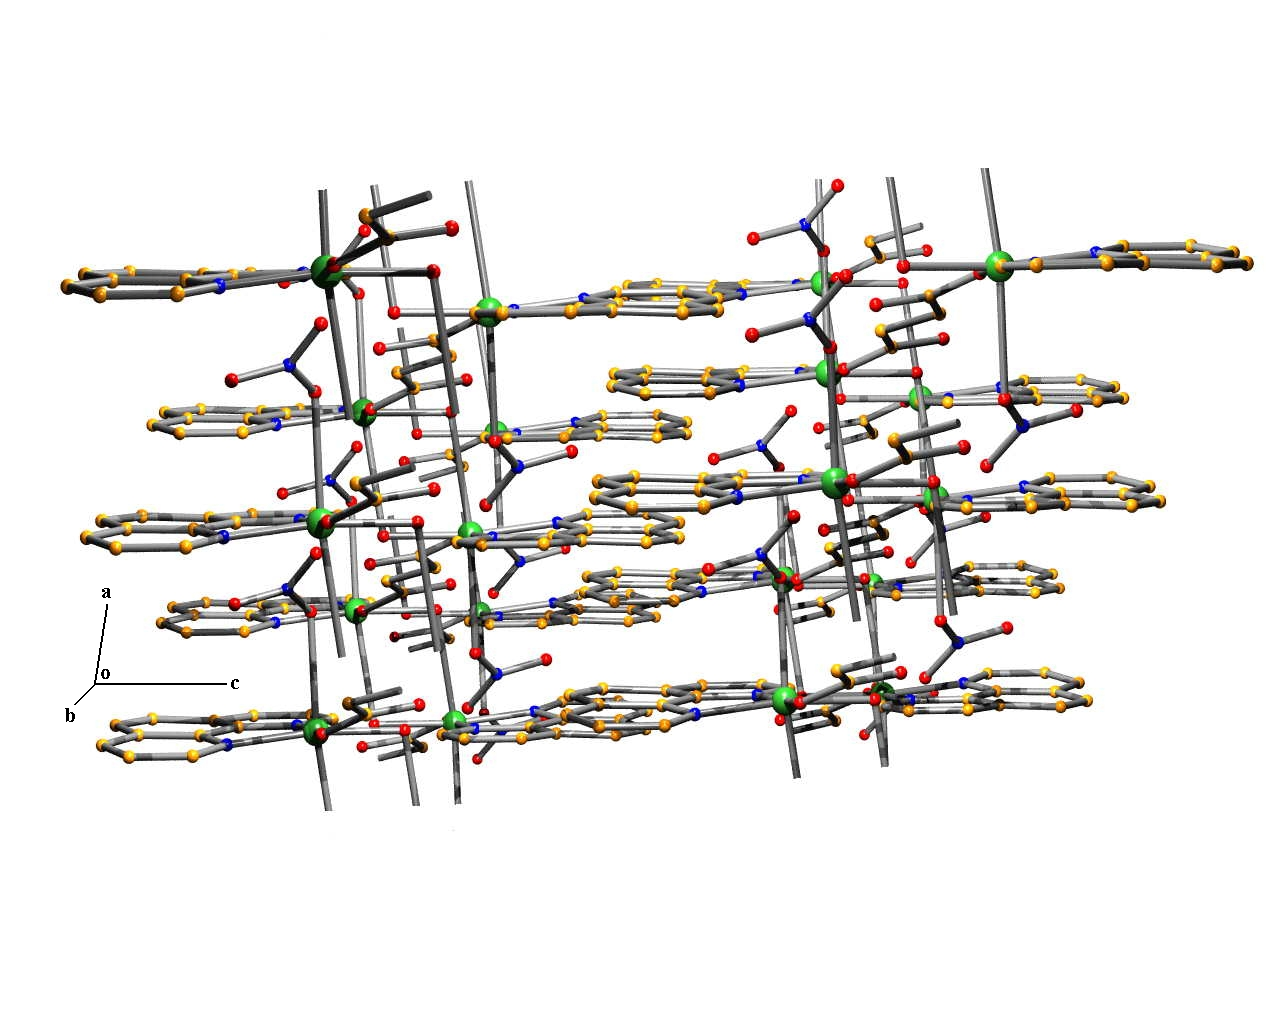


**Supplementary Figure 2.** The 3D supramolecular continuum of **2** constructed by  interaction.


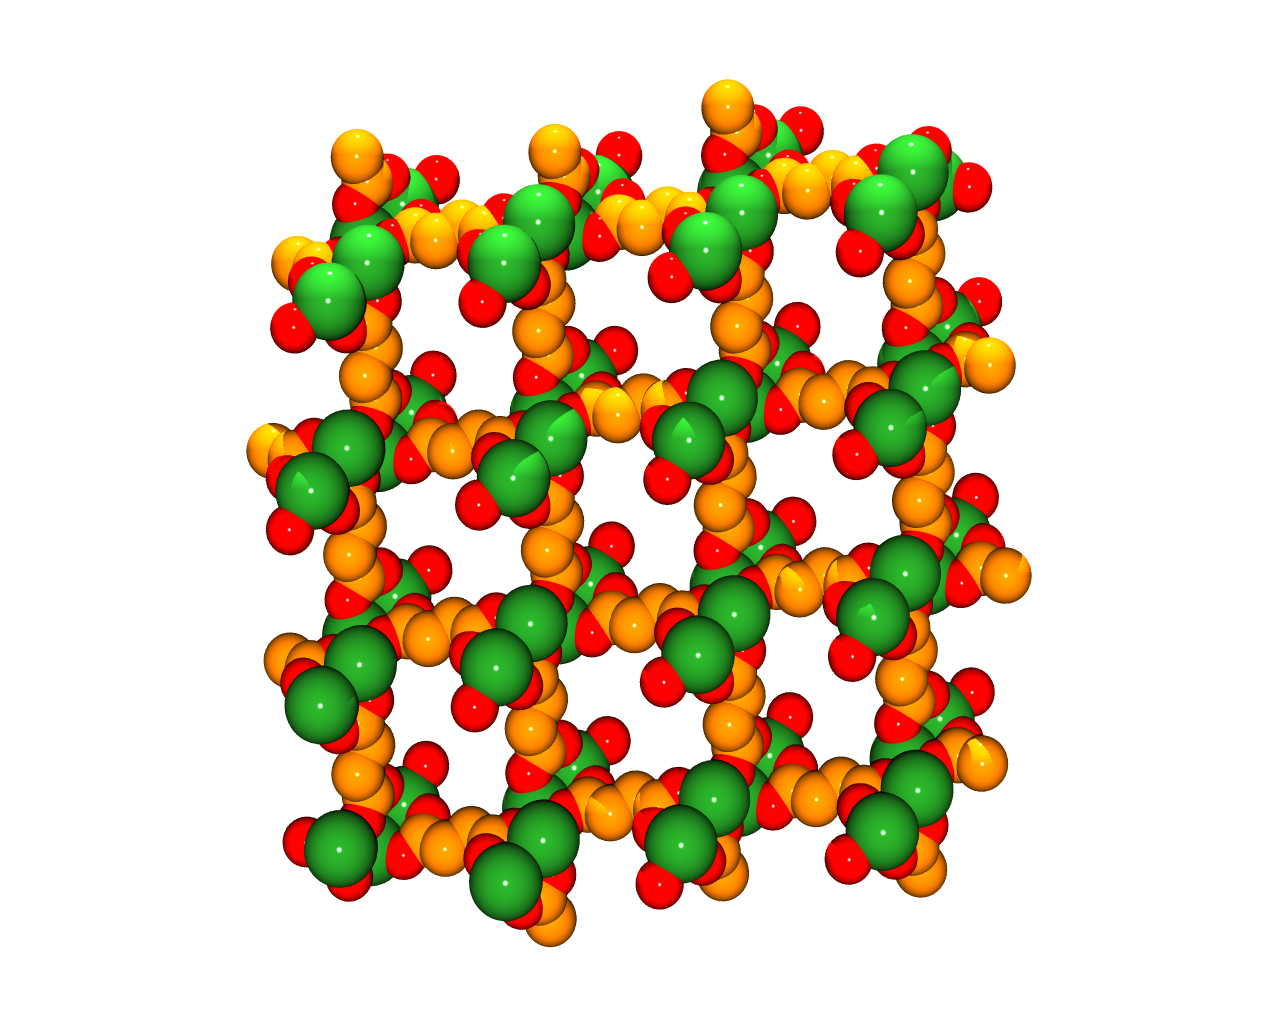


**Supplementary Figure 3:** A CPK diagram of square-grid [Cu(succinate)0.5]n in complex (**3**)corrugated sheets with grid dimensions of 9.591x9.591 Å in the *bc*-plane.


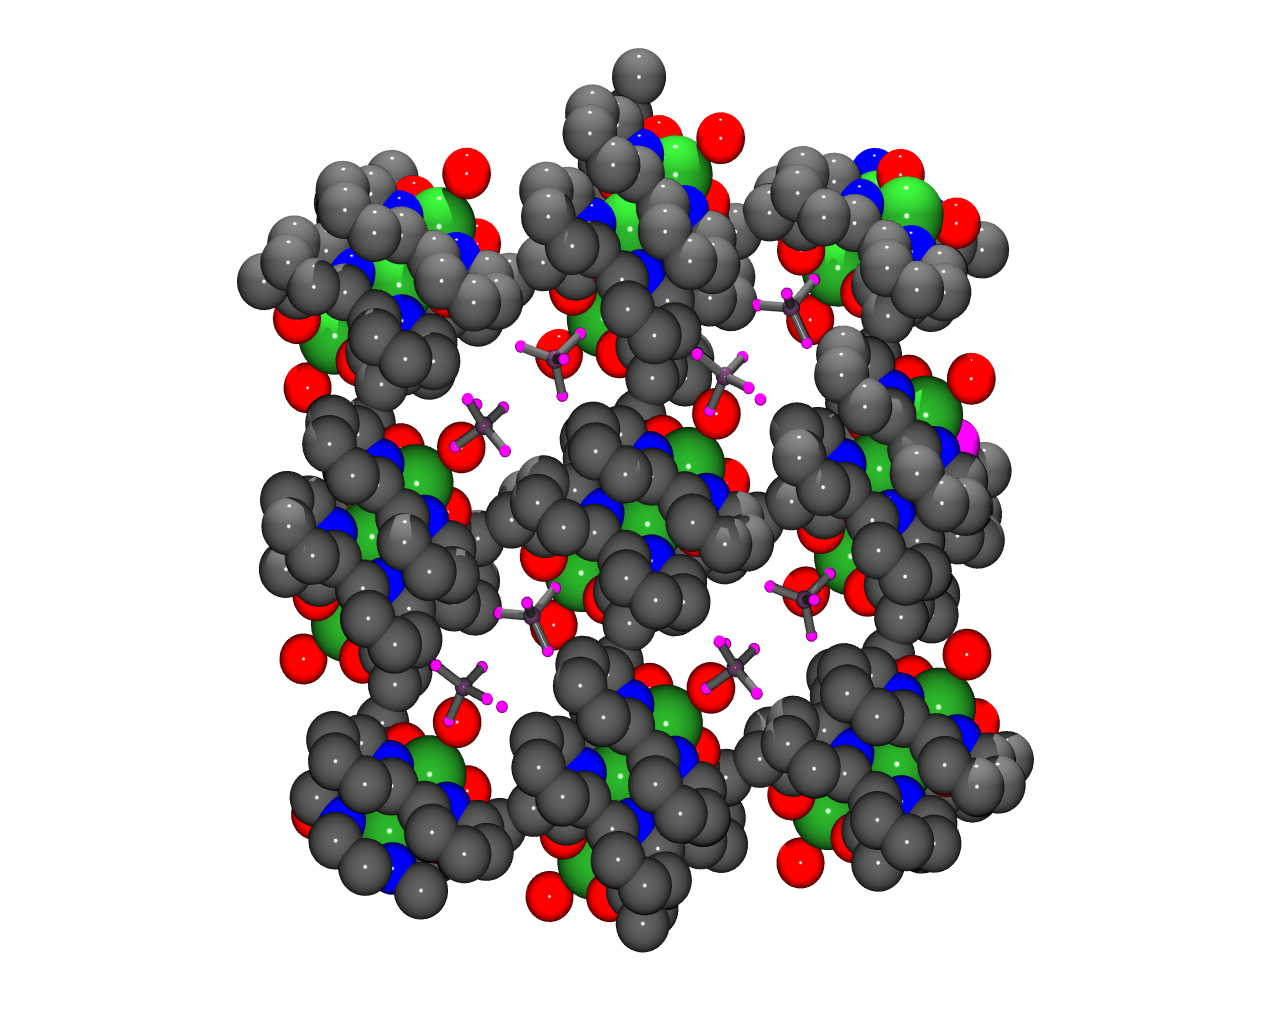


**Supplementary Figure 4:** CPK view of 2D networks of **(3)** in the [100] direction showing channels containing perchlorate anion and water.

**
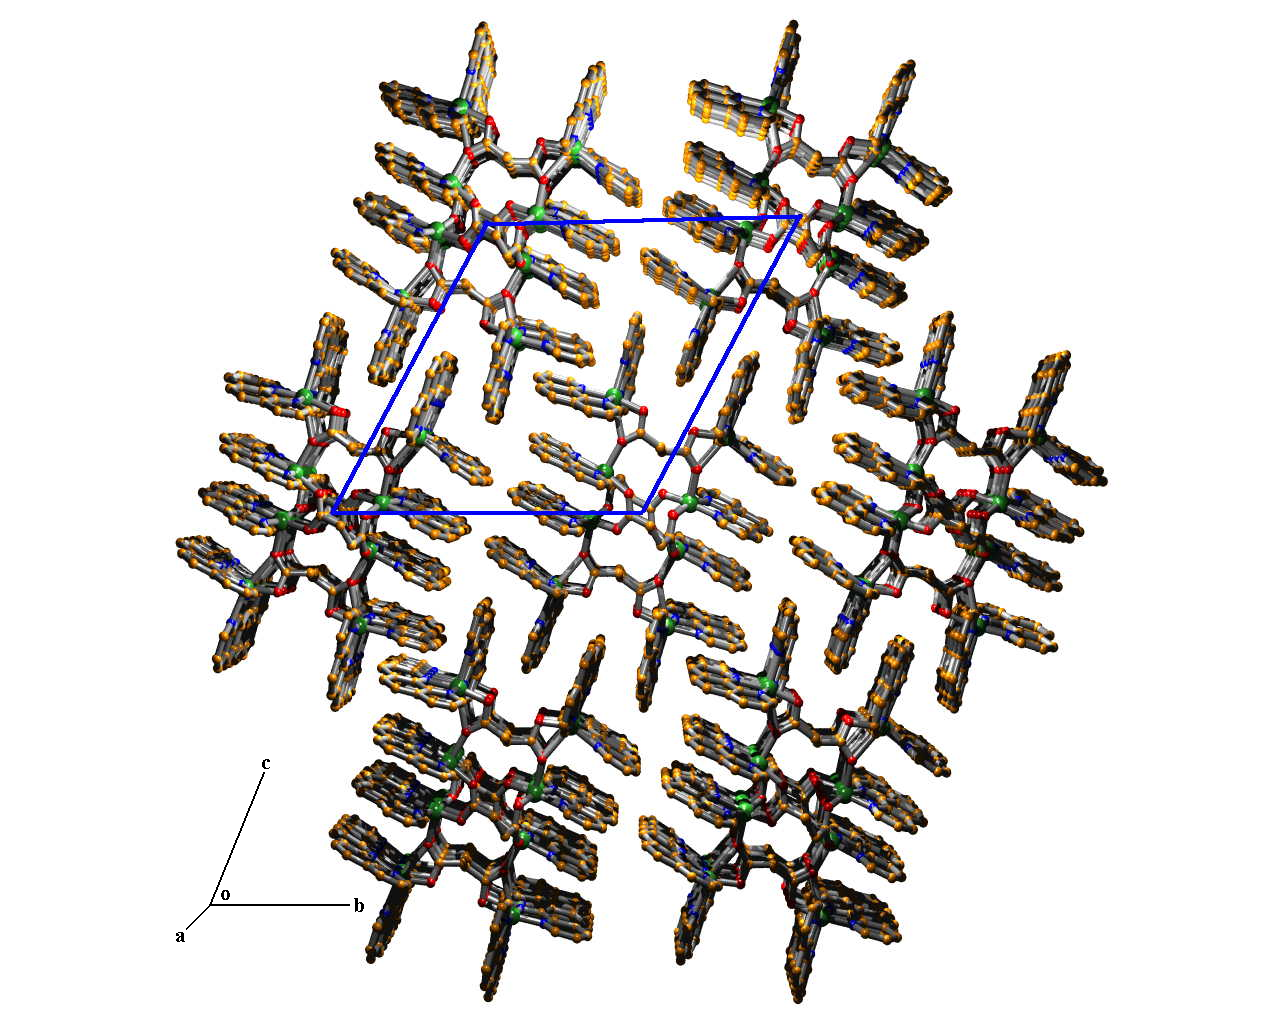
**

**Supplementary Figure 5:** A hexagonal array formed by the cationic part [Cu8L4(phen)12]8+ of **4** surrounded by six same cation.

**Supplementary Figure 6.** Plot of the temperature dependence of *M* and *MT* for **2** (solid lines represent the best fit obtained).
